# Supplementary material for: The Importance of a Distance between the Lines Encircling Pulmonary Veins in Atrial Fibrillation Ablation on First-Pass Isolation Ratio and Clinical Outcomes
Source: MDPI journal article supplement (doi:10.3390/ijerph20075250), 2023-03-24
Supplement: s1 [file s1]

Table S1. Logistic regression analysis for recurrence of atrial arrhythmia - univariate analysis.

|                                                            | Odds ratio (95% CI) | P-value |
|------------------------------------------------------------|---------------------|---------|
| Age                                                        | 0.99 (0.96-1.04)    | 0.95    |
| Gender                                                     | 0.53 (0.21-1.32)    | 0.17    |
| BMI                                                        | 0.99 (0.89-1.09)    | 0.80    |
| Arterial hypertension                                      | 1.04 (0.41-2.66)    | 0.94    |
| Diabetes mellitus                                          | 0.98 (0.37-2.63)    | 0.97    |
| Coronary artery disease                                    | 2.57 (0.98-6.68)    | 0.054   |
| Heart failure                                              | 1.90 (0.50-7.25)    | 0.35    |
| Ejection fraction                                          | 0.95 (0.89-0.998)   | 0.043   |
| The upper distance between lines (mm)                      | 0.99 (0.94-1.04)    | 0.71    |
| The lower distance between lines (mm)                      | 1.01 (0.97-1.05)    | 0.64    |
| The area between the lines indexed to left atrial diameter | 0.81 (0.42-1.54)    | 0.52    |

Table S2. Logistic regression analysis for recurrence of atrial arrhythmia- multivariate analysis.

|                                                            | Odds ratio (95% CI) | P-value |
|------------------------------------------------------------|---------------------|---------|
| Age                                                        | 0.99 (0.93-1.05)    | 0.62    |
| Gender                                                     | 1.21 (0.38-3,80)    | 0.75    |
| Coronary artery disease                                    | 3.58 (0.99-12.90)   | 0.052   |
| Ejection fraction                                          | 0.95 (0.88-1.02)    | 0.13    |
| The upper distance between lines (mm)                      | 0.996 (0.93-1.07)   | 0.92    |
| The lower distance between lines (mm)                      | 0.991 (0.92-1.07)   | 0.83    |
| The area between the lines (cm2)                           | 1.09 (0.72-1.65)    | 0.68    |
| The area between the lines indexed to left atrial diameter | 0.45 (0.07-2.70)    | 0.38    |
